# Supplementary material for: Identifying Potential Prognostic Biomarkers Associated With Clinicopathologic Characteristics of Hepatocellular Carcinoma by Bioinformatics Analysis
Source: Research Square preprint supplement (doi:10.21203/rs.3.rs-146400/v1), 2021-01-25
Supplement: Supplementary file 1 [file 0ebfd9e34cd59442a33b6659.docx]

**Supplementary table 6.** Correlation between CCNB2 expression level and the clinicopathologic characteristics of 25 cases of HCC patients.

| Characteristics |  | | CCNB2 expression level | | Pearson's chi-square test (p-value⁎) |
| --- | --- | --- | --- | --- | --- |
|  |  | | Low | High |
| Gender  Age  Differentiation  Tumor size  Tumor number  TNM stage  Vascular invasion  AFP | | Male  Female  <60  ≥60  High  Moderate/low  <5cm  ≥5cm  Single  Multiple  I+II  III+IV  No  Yes  <20  ≥20 | 10  8  6  6  7  2  3  7  2  6  2  8  1  12  1  11 | 2  5  9  4  8  8  4  11  3  14  4  11  5  7  8  5 | 0.225  0.327  0.174  0.856  0.668  0.702  0.047  0.006 |

⁎ Results were considered statistically significant at p < 0.05.
