# Supplementary material for: Identifying Potential Prognostic Biomarkers Associated With Clinicopathologic Characteristics of Hepatocellular Carcinoma by Bioinformatics Analysis
Source: Research Square preprint supplement (doi:10.21203/rs.3.rs-146400/v1), 2021-01-25
Supplement: Supplementary file 2 [file 741a298426312fa90b9d7822.docx]

**Supplementary table 7.** Correlation between CDK1 expression level and the clinicopathologic characteristics of 25 cases of HCC patients.

| Characteristics |  | | CDK1 expression level | | Pearson's chi-square test (p-value⁎) |
| --- | --- | --- | --- | --- | --- |
|  |  | | Low | High |
| Gender  Age  Differentiation  Tumor size  Tumor number  TNM stage  Vascular invasion  AFP | | Male  Female  <60  ≥60  High  Moderate/low  <5cm  ≥5cm  Single  Multiple  I+II  III+IV  No  Yes  <20  ≥20 | 10  7  5  6  7  1  4  7  2  8  2  9  2  11  1  12 | 2  6  9  5  8  9  4  10  4  11  3  11  5  7  7  5 | 0.114  0.346  0.054  0.678  0.702  0.840  0.144  0.007 |

⁎ Results were considered statistically significant at p < 0.05.
