# Supplementary material for: Identifying Potential Prognostic Biomarkers Associated With Clinicopathologic Characteristics of Hepatocellular Carcinoma by Bioinformatics Analysis
Source: Research Square preprint supplement (doi:10.21203/rs.3.rs-146400/v1), 2021-01-25
Supplement: Supplementary file 3 [file 0f5bc224c4283cb3bffb6ed4.docx]

**Supplementary table 5.** Primary antibodies for IHC staining.

| rabbit anti-CDK1 | ab133327 | Abcam |
| --- | --- | --- |
| rabbit anti-Cyclin B1 | ab32053 | Abcam |
| mouse anti-Cyclin B2 | ab18250 | Abcam |
| rabbit anti-CDC20 | ab86104 | Abcam |
| rabbit anti-Aurora A | ab52973 | Abcam |
| mouse anti-MELK | ab129373 | Abcam |
| rabbit anti-Topoisomerase II alpha | ab52934 | Abcam |
| mouse anti-BubR1  rabbit anti-NUSAP  mouse anti-CDKN3 | ab54894  ab247043  MA5-25690 | Abcam  Abcam  Invitrogen |
