# Supplementary material for: Identifying Potential Prognostic Biomarkers Associated With Clinicopathologic Characteristics of Hepatocellular Carcinoma by Bioinformatics Analysis
Source: Research Square preprint supplement (doi:10.21203/rs.3.rs-146400/v1), 2021-01-25
Supplement: Supplementary file 3 [file ed18355e17c0a67c072cebce.docx]

**Supplementary table 9.** Correlation between NUSAP1 expression level and the clinicopathologic characteristics of 25 cases of HCC patients.

| Characteristics |  | | NUSAP1 expression level | | Pearson's chi-square test (p-value⁎) |
| --- | --- | --- | --- | --- | --- |
|  |  | | Low | High |
| Gender  Age  Differentiation  Tumor size  Tumor number  TNM stage  Vascular invasion  AFP | | Male  Female  <60  ≥60  High  Moderate/low  <5cm  ≥5cm  Single  Multiple  I+II  III+IV  No  Yes  <20  ≥20 | 10  8  6  7  7  2  3  7  2  10  2  8  5  9  6  7 | 2  5  9  3  8  8  4  11  9  4  4  11  5  6  6  6 | 0.225  0.141  0.174  0.856  0.008  0.702  0.622  0.848 |

⁎ Results were considered statistically significant at p < 0.05.
