# Supplementary material for: Identifying Potential Prognostic Biomarkers Associated With Clinicopathologic Characteristics of Hepatocellular Carcinoma by Bioinformatics Analysis
Source: Research Square preprint supplement (doi:10.21203/rs.3.rs-146400/v1), 2021-01-25
Supplement: Supplementary file 4 [file 2d41fc141c5fb49ae787c6f0.docx]

**Supplementary table 2.** Screening overlapping DEGs by integrated GEO data.

| **DEGs** | **Gene names** |
| --- | --- |
| Upregulated | SPINK1 GPC3 TOP2A PBK CCNB1 KIF20A NUF2 ASPM TTK SULT1C2 NEK2 DLGAP5 CCNB2 MELK CRNDE KIF4A HMMR RBM24 PRC1 CDK1 BUB1B ECT2 FAM83D CDC20 RRM2 AKR1B10 BUB1 CAP2 PTTG1 NDC80 ROBO1 AURKA DTL TRIP13 E2F8 ZIC2 CENPW NUSAP1 CDKN3 E2F7 TRIM71 KIF18B GINS1 CTHRC1 CDKN2A REG3A CEP55 FLVCR1 |
| Downregulated | CLEC1B FCN3 CRHBP CXCL14 SLC22A1 CYP1A2 HAO2 LINC01093 MT1F C7 CLEC4M HAMP C9 CYP26A1 CYP2A6 OIT3 AKR1D1 MT1M APOF SLCO1B3 NAT2 MT1G CLEC4G HGF SRPX LCAT ALDOB CLTRN CNDP1 PLAC8 RIPOR3 CYP2B6 SLC25A47 GPM6A IDO2 ESR1 GYS2 DCN GBA3 MARCO RSPO3 BCO2 LPA MT1H NPY1R CETP HGFAC C3orf85 CYP39A1 CNDP1 TTC36 GHR ZG16 LECT2 BBOX1 FOSB RDH16 MT1E C3P1 FCN2 F9 GNMT HPD CD5L STAB2 FOS KCNN2 MT1X SRD5A2 SLC10A1 LINC00844 CYP2C8 IGF1 INMT PGLYRP2 CLRN3 C3orf85 CYP2A7 CYP4A11 JCHAIN |
