# Supplementary material for: Identifying Potential Prognostic Biomarkers Associated With Clinicopathologic Characteristics of Hepatocellular Carcinoma by Bioinformatics Analysis
Source: Research Square preprint supplement (doi:10.21203/rs.3.rs-146400/v1), 2021-01-25
Supplement: Supplementary file 5 [file 46f6ba7cbba45df2258ef1bd.docx]

**Supplementary table 4.** Primers used for qPCR analysis.

| **Gene** | **Sequences (5′ to 3′)** |
| --- | --- |
| hCDK1 | Forward: 5’-AGCCGGGATCTACCATACCC-3’ |
|  | Reverse: 5’-AGGAACCCCTTCCTCTTCACT-3’ |
| hCCNB1 | Forward: 5’-AACATCTGGATGTGCCCCTG-3’ |
|  | Reverse: 5’-GCACACAATTATTCTCAAGTTGTC-3’ |
| hCCNB2 | Forward: 5’-CAGCTGCTTCCTGCTTGTCT-3’ |
| hCDC20 | Reverse: 5’-CATTCTTGGCCATGTGCTGC-3’  Forward: 5’-CTTCCCTGCCAGACCGTATC-3’ |
| hAURKA  hMELK  hTOP2A  hBUB1B  hNUSAP1  hCDKN3 | Reverse: 5’-AGGATGTCACCAGAGCTTGC-3’  Forward: 5’-AGACTTGGGTCCTTGGGTCG-3’  Reverse: 5’-ATCAAATATCCCCGCACTCTGG-3’  Forward: 5’-TGTGGCAGTATGATCACCTCAC-3’  Reverse: 5’-CAGTACTTGGTAAACTTGATGTCTG-3’  Forward: 5′-CCGTCACCATGGAAGTGTCA-3′  Reverse: 5′-TGTCTGGGCGGAGCAAAATA-3′  Forward: 5’-CTTAGGGTGCAGCTGGATGT-3’  Reverse: 5’-ACCCATCCCAGAAGACCTGT-3’  Forward: 5’-GTGTGGACCCTGACTCACAG-3’  Reverse: 5’-CTTCTTGGTGCTCGTCTGGT-3’  Forward: 5’-AGCCGCCCAGTTCAATACAA-3’  Reverse: 5’-TCCCCTCTGGTGCAGAAAAC-3’ |
