# Supplementary material for: Identifying Potential Prognostic Biomarkers Associated With Clinicopathologic Characteristics of Hepatocellular Carcinoma by Bioinformatics Analysis
Source: Research Square preprint supplement (doi:10.21203/rs.3.rs-146400/v1), 2021-01-25
Supplement: Supplementary file 12 [file 0c6343643cb5bbefbae2981e.docx]

**Supplementary table 1.** Detailed information about GEO data were showed in this study.

| **Dataset ID** | **Country** | **Number of samples** | **GPL ID** | **Number of rows per platform** |
| --- | --- | --- | --- | --- |
| GSE41804  GSE45267  GSE84402 | Japan  Taiwan  China | 20N 20T  41N 46T  14N 14T | GPL570  GPL570  GPL570 | 54675  54675  54675 |
| GSE107170 | Italy | 80N 39T | GPL570 | 54675 |
| GSE121248 | Singapore | 37N 70T | GPL570 | 54675 |

Note: GSE, Gene Expression Omnibus Series; GPL, Gene Expression Omnibus Platform; T, tumor samples; N, paracancerous normal samples.
